# Supplementary material for: The Lysis of Pathogenic Escherichia coli by Bacteriophages Releases Less Endotoxin Than by β-Lactams
Source: PubMed Central journal article supplement — Clin Infect Dis. 2017 Mar 1;64(11):1582–8. doi: 10.1093/cid/cix184 (PMC5434335; doi:10.1093/cid/cix184), 2017-03-01

# Supplemental Digital Content

Linked to the manuscript entitled “The lysis of pathogenic *Escherichia coli* by bacteriophages releases less endotoxin than betalactams” by Dufour *et al.*

**Table S1:** Nonlinear regression parameters associated with the modeling of the evolution of the free endotoxin concentration according to time obtained with strain 536 in presence of Imipenem, Ceftriaxone, 536\_P1 and Amikacin.

| Sigmoid function        | Imipenem  |
|-------------------------|-----------|
| <b>Best-fit values</b>  |           |
| $V_{max}$               | 23616     |
| h                       | 2.888     |
| K                       | 86541     |
| <b>Std. Error</b>       |           |
| $V_{max}$               | 790.4     |
| h                       | 0.3189    |
| K                       | 103758    |
| <b>Goodness of Fit</b>  |           |
| Degrees of Freedom      | 9         |
| $R^2$                   | 0.9906    |
| Absolute Sum of Squares | 7,35E+06  |
| $Sy.x$                  | 903.7     |
| <b>Constraints</b>      |           |
| h                       | $h > 0.0$ |
| K                       | $K > 0.0$ |

| Exponential growth function | Ceftriaxone |
|-----------------------------|-------------|
| <b>Best-fit values</b>      |             |
| $Y_0$                       | 447.3       |
| K                           | 0.02658     |
| <b>Std. Error</b>           |             |
| $Y_0$                       | 433.4       |
| K                           | 0.00539     |
| <b>Goodness of Fit</b>      |             |
| Degrees of Freedom          | 10          |
| $R^2$                       | 0.9812      |
| Absolute Sum of Squares     | 8,72E+07    |
| $Sy.x$                      | 2953        |

| Reverse exponential function | 536_P1        | Amikacin      |
|------------------------------|---------------|---------------|
| <b>Best-fit values</b>       |               |               |
| $Y_0$                        | 429.5         | 429.5         |
| Plateau                      | 24779         | 8824          |
| K                            | 0.003985      | 0.01981       |
| <b>Std. Error</b>            |               |               |
| Plateau                      | 3263          | 245.3         |
| K                            | 0.0007158     | 0.00126       |
| <b>Goodness of Fit</b>       |               |               |
| Degrees of Freedom           | 10            | 10            |
| $R^2$                        | 0.9937        | 0.9905        |
| Absolute Sum of Squares      | 1,26E+06      | 807297        |
| $Sy.x$                       | 354.2         | 284.1         |
| <b>Constraints</b>           |               |               |
| $Y_0$                        | $Y_0 = 429.5$ | $Y_0 = 429.5$ |
| K                            | $K > 0.0$     | $K > 0.0$     |

**Table S2:** Nonlinear regression parameters associated with the modeling of the evolution of the free endotoxin concentration according to time obtained with strain LM33 in presence of Cefoxitin, Imipenem, LM33\_P1 and Amikacin.

| <b>Sigmoid function</b> | <b>Cefoxitin</b> | <b>Imipenem</b> |
|-------------------------|------------------|-----------------|
| <b>Best-fit values</b>  |                  |                 |
| $V_{max}$               | 13629            | 63504           |
| h                       | 1.715            | 1.753           |
| K                       | 493.9            | 4576            |
| <b>Std. Error</b>       |                  |                 |
| $V_{max}$               | 1864             | 29102           |
| h                       | 0.5781           | 0.6009          |
| K                       | 934.1            | 8312            |
| <b>Goodness of Fit</b>  |                  |                 |
| Degrees of Freedom      | 9                | 9               |
| $R^2$                   | 0.8919           | 0.9767          |
| Absolute Sum of Squares | 2.199e+007       | 5.588e+007      |
| $Sy.x$                  | 1563             | 2492            |
| <b>Constraints</b>      |                  |                 |
| h                       | $h > 0.0$        | $h > 0.0$       |
| K                       | $K > 0.0$        | $K > 0.0$       |

| <b>Reverse exponential function</b> | <b>LM33_P1</b> | <b>Amikacin</b> |
|-------------------------------------|----------------|-----------------|
| <b>Best-fit values</b>              |                |                 |
| $Y_0$                               | 1579           | 1579            |
| Plateau                             | 5888           | 8179            |
| K                                   | 0.05645        | 0.04223         |
| <b>Std. Error</b>                   |                |                 |
| Plateau                             | 782.7          | 394.6           |
| K                                   | 0.03751        | 0.007632        |
| <b>Goodness of Fit</b>              |                |                 |
| Degrees of Freedom                  | 10             | 10              |
| $R^2$                               | 0.5511         | 0.9368          |
| Absolute Sum of Squares             | 2.134e+007     | 4.150e+006      |
| $Sy.x$                              | 1461           | 644.2           |
| <b>Constraints</b>                  |                |                 |
| $Y_0$                               | $Y_0 = 1579$   | $Y_0 = 1579$    |
| K                                   | $K > 0.0$      | $K > 0.0$       |

**Figure S1**

**A. Adsorption of bacteriophage 536\_P1 on its host 536.** Strain 536 grown in LB at 37 °C with shaking (100 rpm) was mixed with bacteriophage 536\_P1 at a MOI of  $10^{-4}$  and aliquots were taken at the indicated time points. Dots represent the mean of 3 independent experiments with the standard deviation.

**B. Bacteriophage 536\_P1 growth parameters.** Bacteriophage 536\_P1 was mixed with strain 536 (MOI  $10^{-1}$ ) at 37 °C with shaking. At the indicated time points, samples were analyzed in absence (grey lines) or in presence (black lines) of chloroform. The continuous lines represent the experimental measurements (mean of 2 independent experiments with standard error) while the dashed lines are the nonlinear regression obtained from these points.

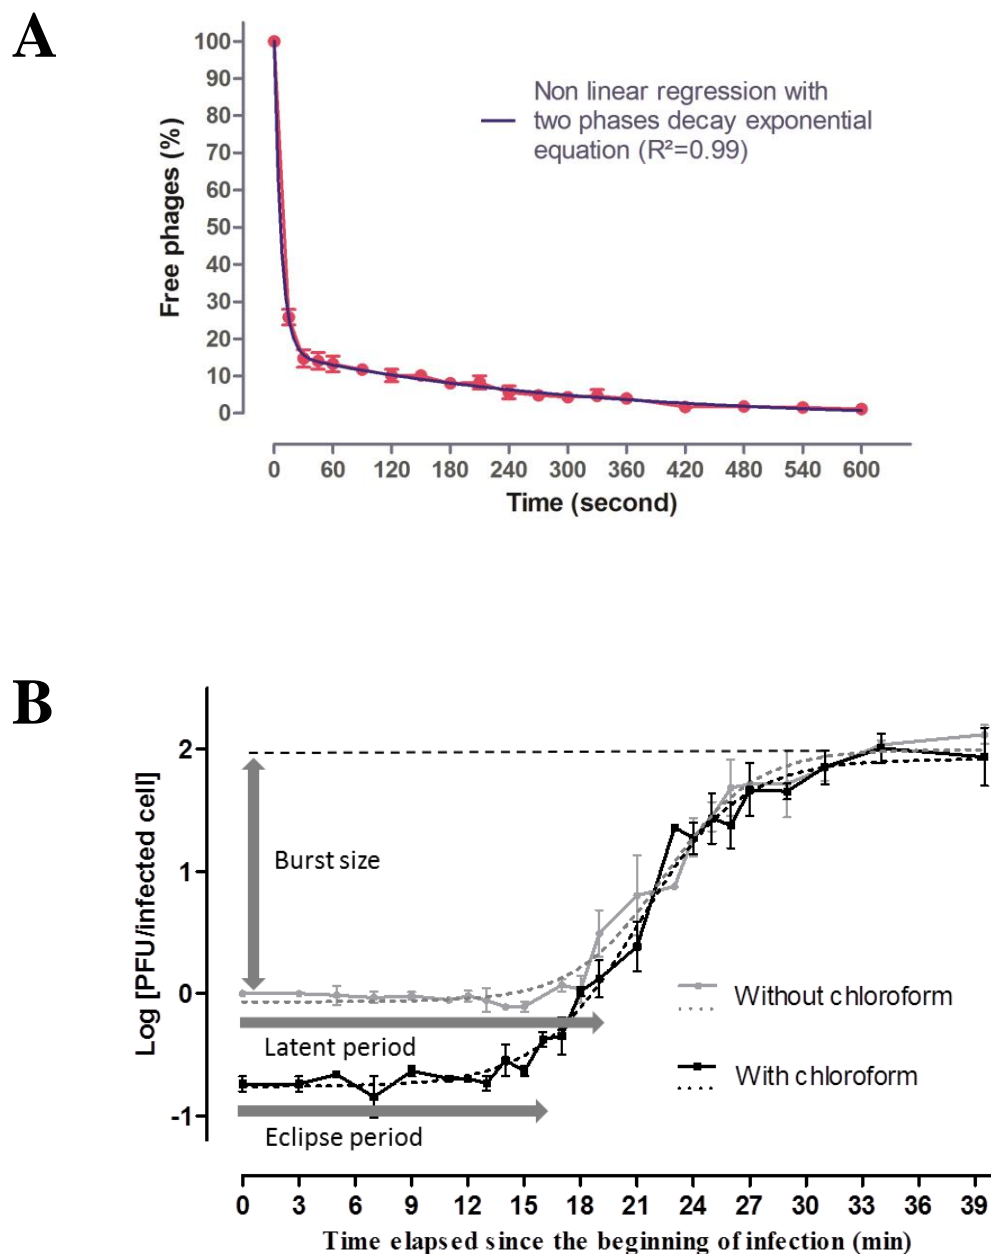

Supplement: cix184_suppl_Supplemental_Data.pdf [file cix184_suppl_Supplemental_Data.pdf]
